# Supplementary material for: Comparison of Clinical, Immunological And Radiological Characteristics In Autoimmune GFAP Astrocytopathy, MOGAD And AQP4-Igg +NMOSD Mimicking Infectious Meningitis As The Initial Manifestation
Source: Research Square preprint supplement (doi:10.21203/rs.3.rs-1250290/v1), 2022-01-14
Supplement: Supplementary file 1 [file 54ee5bc23c33948863ef3986.xlsx]

## Sheet: Sheet1
Supplementary Table 3 Individual data of 11 patients with AQP4-IgG + NMOSD
	Patient 1	Patient 2	Patient 3	Patient 4	Patient 5	Patient 6
Demographic
Gender	M	F	F	F	F	F
Age at attack,y	40	29	25	35	23	41
Course of disease	7D	40D	30D	4D	30D	4D
Clinical Features
Meningeal symtoms	Fever	Headache	Headache, fever	Headache, fever	Headache	Headache
Other manifestations	Blurred vision, dizziness	Hiccup, dizziness	(-)	Blurred vision, cognitive decline	Blurred vision, dizziness	Blurred vision, sensory abnormalities
Brain MRI fingdings
T2-lesions	Medulla, area postrema	Area postrema	Bilateral frontal, parital lobe cortex	Bilateral centrum semiovale, pons	Medulla, area postrema	Medulla
T1-enhancement lesions	Gd (+)	Gd (+)	Normality	Normality	Gd (+)	Gd (+)
CSF fingdings
WBC, ×106/L	1	7	30	48	0	4
Protein, mg/L	369	296	494	876	378	450
Lactic acid, mmol/L	1.9	1.95	1.62	3.13	1.63	3.25
LDH, U/L	17	18	15	46	20	39
Oligoclonal bands	(-)	(-)	NA	(-)	(-)	NA
IgG index	0.7	0.5	NA	0.9	0.7	NA
Albumin quotient	6.3	4.3	NA	11.5	5.5	NA
IgG, mg/L	55.2	24.2	21.5	125	59	37.2
IgM, mg/L	1	0.3	0.4	12.6	0.7	1.1
IgA, mg/L	5.4	2.1	3.6	18.4	4	3
AQP4 antibodies	Serum: 1:10 CSF: NA	Serum: 1:10 CSF: (-)	Serum: 1:10 CSF: (-)	Serum: 1:320 CSF: 1:32	Serum: 1:32 CSF: 1:1	Serum: 1:100 CSF: 1:1
Other autoantibodies	ANA, SSA	NA	NA	(-)	ANA, SSA, SSB	(-)
Treatment
Acute stage treatment	IVMP	IVMP	(-)	IVMP+IVIG	IVMP+IVIG	IVMP+IVIG+PLEX
Maintenance therapy	OS	OS	(-)	OS+TCL	OS+TCL	OS+MMF
mRS score
mRS at attack nadir	1	2	0	3	1	5
mRS after acute treatment	4	1	0	2	0	4
	Patient 7	Patient 8	Patient 9	Patient 10	Patient 11
Demographic
Gender	F	F	F	F	F
Age at attack,y	41	44	47	67	17
Course of disease	4D	60D	1D	7D	5D
Clinical Features
Meningeal symtoms	Headache	Headache	Fever	Fever	Headache
Other manifestations	Blurred vision, sensory abnormalities	Sensory abnormalities	Limb paralysis, sensory abnormalities, dysuria	Hiccup, sensory abnormalities, limb paralysis	Dizziness
Brain MRI fingdings
T2-lesions	Medulla	Pons	Normality	Medulla, area postrema, blilateral centrum semiovale	ADEM-like lesions
T1-enhancement lesions	Gd (+)	Gd (+)	Normality	NA	NA
CSF fingdings
WBC, ×106/L	NA	Apr 2015: 0 Jun 2015: 4	6	10	NA
Protein, mg/L	NA	Apr 2015: 386 Jun 2015: 526	274	453	NA
Lactic acid, mmol/L	NA	Apr 2015: 3.08 Jun 2015: 2	2.71	2.34	NA
LDH, U/L	NA	Apr 2015: 17 Jun 2020: 17	21	220	NA
Oligoclonal bands	NA	Apr 2015: NA Jun 2015: (-)	(-)	(-)	NA
IgG index	NA	Apr 2015: NA Jun 2015: 0.7	0.7	0.6	NA
Albumin quotient	NA	Apr 2015: NA Jun 2015: 8.3	3.3	7.2	NA
IgG, mg/L	NA	Apr 2015: 51.3 Jun 2015: 62.9	57.4	48.1	NA
IgM, mg/L	NA	Apr 2015: 1.1 Jun 2015: 1.2	0.7	1.1	NA
IgA, mg/L	NA	Apr 2015: 3.8 Jun 2015: 5.8	4.1	2.8	NA
AQP4 antibodies	Serum: 1:1000 CSF: NA	Serum: 1:10 CSF: 1:32	Serum: 1:10 CSF: NA	Serum: 1:320 CSF: 1:3.2	Serum: 1:32 CSF: NA
Other autoantibodies	ANA, SSA	ANA, SSA	ANA, SSA, SSB	Serum GD1b, ANA	NA
Treatment
Acute stage treatment	IVMP	IVMP	IVMP+IVIG	IVMP+PLEX	IVMP
Maintenance therapy	OS+AZA	OS+AZA	OS+AZA	OS+TCL	OS+TCLa
mRS score
mRS at attack nadir	1	1	5	3	2
mRS after acute treatment	0	1	3	1	1
