# Supplementary material for: Comparison of Clinical, Immunological And Radiological Characteristics In Autoimmune GFAP Astrocytopathy, MOGAD And AQP4-Igg +NMOSD Mimicking Infectious Meningitis As The Initial Manifestation
Source: Research Square preprint supplement (doi:10.21203/rs.3.rs-1250290/v1), 2022-01-14
Supplement: Supplementary file 2 [file 80b68d163609cb9dabb777a0.xlsx]

## Sheet: Sheet1
Supplementary Table 2 Individual data of 17 patients with MOGAD
	Patient 1	Patient 2	Patient 3	Patient 4	Patient 5	Patient 6	Patient 7	Patient 8	Patient 9
Demographic
Gender	F	M	F	M	M	M	F	M	M
Age at attack,y	37	24	14	23	28	37	50	42	29
Course of disease	60D	30D	10D	12D	30D	4D	1D	20D	7D
Clinical Features
Meningeal symtoms	Headache, fever	Headache, fever	Headache, fever	Headache, fever	Headache, fever	Headache, fever	Headache, fever	Headache, fever	Headache
Other manifestations	Confusion, blurred vision, limb paralysis	Blurred vision	Confusion, seizures	Confusion, seizures	Blurred vision, seizures	Tremor	Confusion, limb paralysis, dysuria	(-)	Dysuria
Brain MRI fingdings
T2-lesions	ADEM-like lesions	Bilateral centrum senimovale, cortical edema	Cortical edema	Cortical edema	Left temproal, frontal cortex, cortical edema	Pons, cortical edema	Normality	Normality	ADEM-like lesions
T1-enhancement lesions	Meningeal Gd+	Meningeal Gd++	Meningeal Gd+	Meningeal Gd+	Meningeal Gd+	Meningeal Gd+	Normality	Meningeal Gd++	Meningeal Gd+
CSF fingdings
WBC, ×106/L	25	68 (93% L)	120 (88% L)	2	105(87% L)	Oct 2018: 100 (90% L) Nov 2018: 20	0	80 (81% L)	240 (79% L)
Protein, mg/L	1276	328	488	426	354	Oct 2018: 297 Nov 2018: 2559	657	775	1322
Lactic acid, mmol/L	1.8	2.17	1.63	1.73	1.52	Oct 2018: 2.14 Nov 2018: 1.83	2.3	2.05	2.05
LDH, U/L	20	13	24	15	13	Oct 2018: 16 Nov 2018: 12	69	22	18
Oligoclonal bands	(-)	(-)	NA	(-)	(-)	Jun 2020: (-) Jul 2020: NA	NA	NA	NA
IgG index	0.8	0.8	NA	0.5	0.4	Oct 2018: 0.6 Nov 2018: NA	NA	NA	NA
Albumin quotient	20	4.2	NA	6.1	5.7	Oct 2018: 3.2 Nov 2018: NA	NA	NA	NA
IgG, mg/L	171	36.9	50.8	40.3	47.9	Oct 2018: 21.5 Nov 2018: 13.9	105	62.4	212
IgM, mg/L	8.8	2.6	1.8	0.5	1.1	Oct 2018: 0.4 Nov 2018: 0.2	2.7	1.7	9
IgA, mg/L	18.8	4.2	7.6	6.6	5.8	Oct 2018: 6.6 Nov 2018: 2.5	9.8	8.4	48.5
MOG antibodies	Serum: 1:1000 CSF: 1:10	Serum: 1:100 CSF: NA	Serum: (-) CSF: 1:1	Serum: 1:100 CSF: 1:10	Serum: 1:10 CSF: 1:1	Serum: 1:10 CSF: NA	Serum: (-) CSF: 1:32	Serum: 1:10 CSF: (-)	Serum: 1:10 CSF: (-)
Other autoantibodies	Serum GD1b (+)	NA	(-)	CSF NMDAR-IgG: 1:1	ANA	(-)	(-)	(-)	NA
Treatment
Acute stage treatment	IVMP	IVMP	IVMP	IVMP	IVMP+IVIG	IVMP	(-)	IVMP	IVMP
Maintenance therapy	OS+AZA	OS	OS	OS+TCL	OS	OS	(-)	(-)	OS+TCLa
mRS score
mRS at attack nadir	5	1	1	5	2	1	5	1	1
mRS after acute treatment	3	1	0	1	1	0	5	0	0
	Patient 10	Patient 11	Patient 12	Patient 13	Patient 14	Patient 15	Patient 16	Patient 17
Demographic
Gender	M	F	F	M	M	M	M	M
Age at attack,y	24	38	28	29	29	61	42	13
Course of disease	14D	30D	30D	11D	11D	7D	12D	18D
Clinical Features
Meningeal symtoms	Headache	Headache	Headache, fever	Headache, fever	Headache, fever	Fever	Headache, fever	Headache, fever
Other manifestations	(-)	Ataxia, dizziness	Dizziness	Sensory abnormalities, diplopia, ataxia	Limb paralysis, sensory abnormalities, dysuria	Blurred vision, dizziness	Ataxia, limb paralysis, coma, respiratory failure	Blurred vision
Brain MRI fingdings
T2-lesions	Cortical edema	ADEM-like lesions	Bilateral frontal subcortex	ADEM-like lesions	ADEM-like lesions	Normality	Right centrum senimovale	Normality
T1-enhancement lesions	Normality	Normality	Normality	Normality	Meningeal Gd+	Meningeal Gd++	Meningeal Gd++	Normality
CSF fingdings
WBC, ×106/L	170 (88% L)	18	0	NA	50 (80% L)	0	120 (88% L)	480 (85% L)
Protein, mg/L	331	455	317	NA	352	250	1299	780
Lactic acid, mmol/L	1.48	2.46	1.63	NA	2.36	2.05	3.85	3.15
LDH, U/L	28	15	11	NA	22	20	22	19
Oligoclonal bands	(-)	(-)	(-)	NA	(-)	(-)	(-)	(-)
IgG index	0.7	0.7	0.7	NA	0.8	0.7	0.8	0.6
Albumin quotient	3.4	6.7	4.9	NA	4.5	3.7	30.7	12.9
IgG, mg/L	28.4	47.8	33.6	NA	30.1	24.8	252	82.1
IgM, mg/L	0.6	1.4	0.6	NA	0.4	0.6	6.1	4.7
IgA, mg/L	3.2	3.1	5.2	NA	4.3	2.5	26.5	20.4
MOG antibodies	Serum: 1:32 CSF: NA	Serum: 1:320 CSF: (-)	Serum: 1:10 CSF: (-)	Serum: 1:10 CSF: (-)	Serum: 1: 3200 CSF: 1:10	Serum: 1:100 CSF: (-)	Serum: (-) CSF: 1:32	Serum: 1:10 CSF: (-)
Other autoantibodies	(-)	(-)	(-)	NA	NA	NA	NA	NA
Treatment
Acute stage treatment	IVMP	IVMP	(-)	IVMP	IVMP	(-)	IVMP+IVIG	IVMP
Maintenance therapy	OS+ MMF	OS	(-)	OS+TCL	OS+TCLa	(-)	OS	OS
mRS score
mRS at attack nadir	1	3	1	3	2	2	5	2
mRS after acute treatment	0	1	1	1	1	0	1	0

## Sheet: Sheet2
5	5
1	1
2	0
0	0
2.75	2
