# Supplementary material for: Comparison of Clinical, Immunological And Radiological Characteristics In Autoimmune GFAP Astrocytopathy, MOGAD And AQP4-Igg +NMOSD Mimicking Infectious Meningitis As The Initial Manifestation
Source: Research Square preprint supplement (doi:10.21203/rs.3.rs-1250290/v1), 2022-01-14
Supplement: Supplementary file 3 [file 982a67771ccadcc15a10c0b8.xlsx]

## Sheet: Sheet1
Supplementary Table 1 Individual data of 9 patients with autoimmune GFAP astrocytopathy
	Patient 1	Patient 2	Patient 3	Patient 4	Patient 5	Patient 6	Patient 7	Patient 8	Patient 9
Demographic
Gender	M	F	M	F	M	M	M	F	M
Age at attack,y	68	48	14	22	33	41	30	32	64
Course of disease	20D	8D	20D	2Y	18D	5D	20D	12D	5D
Clinical Features
Meningeal symtoms	Headache, fever	Headache, fever	Fever	Headache, fever	Headache, fever	Fever	Fever	Headache, fever	Headache, fever
Other manifestations	Dizziness,diplopia, confusion, tremor, nystagmus, ataxia	Dysuria, paraplegia, sensory abnormalities, blurred vision	Confusion, limb paralysis, sensory abnormalities, dysuria	Ataxia, confusion, seizures, tremor	Tremor, dizziness	Dizziness, confusion, dysuria	Dizziness, limb paralysis, dysuria	Paraplegia, coma, respiratory failure	Tremor, coma, respiratory failure
Brain MRI fingdings
T2-lesions	Bilateral basal ganglia, centrum semiovale	NA	Bilateral basal ganglia, medulla	Cortical edema	Normality	Bilateral thalamus, basal ganglia, corona radiata	Right frontal subcortex basal ganglia, thalamus	Bilateral basal ganglia, thalamus, pons, medulla	Bilateral basal ganglia
T1-enhancement lesions	Meningeal Gd++ “radial enhancement”	Meningeal Gd++	Meningeal Gd++ “radial enhancement”	Meningeal Gd++	Meningeal Gd++	Meningeal Gd++ “radial enhancement”	“radial enhancement”	Meningeal Gd++ “radial enhancement”	Meningeal Gd++ “radial enhancement”
CSF fingdings
WBC, ×106/L	1600 (89% L)	41	150 (70% L)	Aug 2018: 82 (95% L) May 2020: (-)	Mar 2019: 240 (95% L) Dec 2020: 2	Jun 2020: 209 (95% L) Jul 2020: 100 (93% L)	0	Feb 2021: 90 (92% L) Mar 2021: 12	40
Protein, mg/L	1487	1099	1035	Aug 2018: 677 May 2020: (-)	Mar 2019: 1319 Dec 2020: 356	Jun 2020:1591 Jul 2020: 1064	725	Feb 2021: 1937 Mar 2021: 561	3546
Lactic acid, mmol/L	3.94	3.22	2.91	Aug 2018: 2.14 May 2020: 1.57	Mar 2019: 3.23 Dec 2020: 1.97	Jun 2020: 3.26 Jul 2020: 4.73	3.17	Feb 2021: 5.01 Mar 2021: 2.79	4.59
LDH, U/L	35	26	63	Aug 2018: 25 May 2020: 20	Mar 2019: 28 Dec 2020: 17	Jun 2020: 65 Jul 2020: 54	29	Feb 2021: 123 Mar 2021: 32	101
Oligoclonal bands	(-)	(-)	NA	Aug 2018: NA May 2020: (-)	Mar 2019: (+) Dec 2020: (-)	Jun 2020: (-) Jul 2020: (-)	(-)	Feb 2021: NA Mar 2021: (+)	NA
IgG index	0.9	0.6	NA	Aug 2018: NA May 2020: 0.8	Mar 2019: 0.9 Dec 2020: 0.7	Jun 2020: 0.7 Jul 2020: 0.9	0.6	Feb 2021: NA Mar 2021: 1.4	NA
Albumin quotient	23	17.2	NA	Aug 2018: NA May 2020: 4.8	Mar 2019: 8.7 Dec 2020: 4.2	Jun 2020: 21.9 Jul 2020: 16.3	13.2	Feb 2021: NA Mar 2021: 7	NA
IgG, mg/L	175	129	94.6	Aug 2018: 63.6 May 2020: 26.5	Mar 2019: 91.7 Dec 2020: 22	Jun 2020: 130 Jul 2020: 75.3	68.1	Feb 2021: 248 Mar 2021: 104	178
IgM, mg/L	14.4	7.8	4	Aug 2018:5.2 May 2020: 0.7	Mar 2019: 5.6 Dec 2020: 0.2	Jun 2020: 7.1 Jul 2020: 2.5	3.7	Feb 2021: 22.5 Mar 2021: 2.7	7
IgA, mg/L	32	19.2	16.3	Aug 2018: 15.3 May 2020: 1.5	Mar 2019: 22.8 Dec 2020: 2.1	Jun 2020: 17 Jul 2020: 9.9	10.7	Feb 2021: 48.5 Mar 2021: 10.1	25.2
GFAP antibodies	Serum: 1:100 CSF: 1:100	Serum: (-) CSF: 1:3.2	Serum: 1:32 CSF: 1:10	Serum: (-) CSF: 1:3.2	Serum: 1:32 CSF: 1:32	Serum: (-) CSF: 1:3.2	Serum: (-) CSF: 1:3.2	Serum: (-) CSF: 1:32	Serum: (-) CSF: 1:10
Other autoantibodies	NA	(-)	Serum DPPX: 1:320	SSB	NA	(-)	(-)	(-)	(-)
Treatment
Acute stage treatment	IVMP	IVMP	IVMP	IVMP+IVIG	IVMP+IVIG	IVMP	IVMP	IVMP+IVIG	IVMP+IVIG
Maintenance therapy	OS	OS+TCL	OS	OS	OS+TCL	OS+TCL	NA	OS+TCL	OS
mRS score
mRS at attack nadir	4	4	5	2	2	3	3	5	5
mRS after acute treatment	1	3	3	0	1	2	1	1	3
Abbreviations: ANA, antinuclear antibody; AQP-4, aquaporin-4; CSF, cerebrospinal fluid; D, days; DPPX, dipeptidyl-peptidase-like protein 6; F, female; Gd+, Gadolinium-enhancing lesions, GD1a, antiganglioside 1a; GFAP, glial fibrillary acidic protein; IVIg, intravenous immunoglobulins; IVMP, intravenous methylprednisolone; L, lymphocytes; M, male; ME, meningoencephalitis; MEM, meningoencephalomyel…
